# Supplementary material for: Highly selective photocatalytic oxidation of 5-hydroxymethylfurfural by interfacial Pt–O bonding Pt–Ov–BiOBr
Source: Royal Society of Chemistry journal article supplement (doi:10.1039/d3nj00498h), 2023-01-01
Supplement: d3nj00498h1.pdf [file d3nj00498h1.pdf]

## Supporting information

### Highly selective photocatalytic oxidation of 5-hydroxymethylfurfural by interfacial Pt-O bonding Pt-Ov-BiOBr

Ming Gong,<sup>a</sup> Hui Zhao,<sup>a</sup> Chengsi Pan,<sup>a</sup> Yuming Dong,<sup>\*a</sup> Yingxin Guo,<sup>a</sup> Haixia Li,<sup>a</sup> Jiawei Zhang,<sup>a</sup> Guangli Wang,<sup>a</sup> and Yongfa Zhu<sup>b</sup>

- a. International Joint Research Center for Photoresponsive Molecules and Materials, School of Chemical and Material Engineering, Jiangnan University, Wuxi 214122, China.
- b. Department of Chemistry, Tsinghua University, Beijing 100084, China.

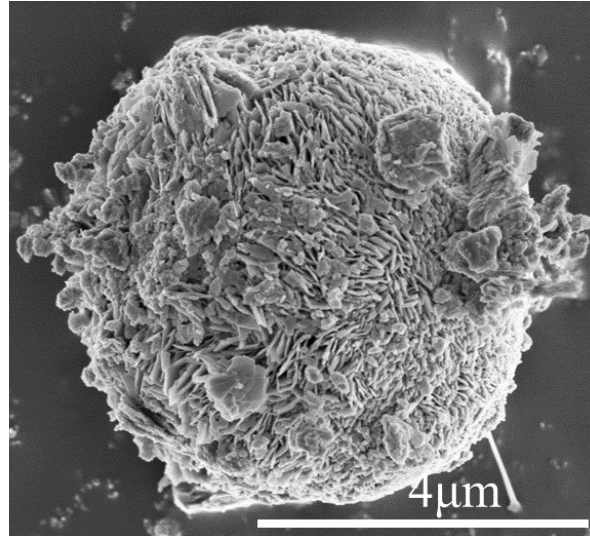

Fig. S1 SEM diagrams of Ov-BiOBr

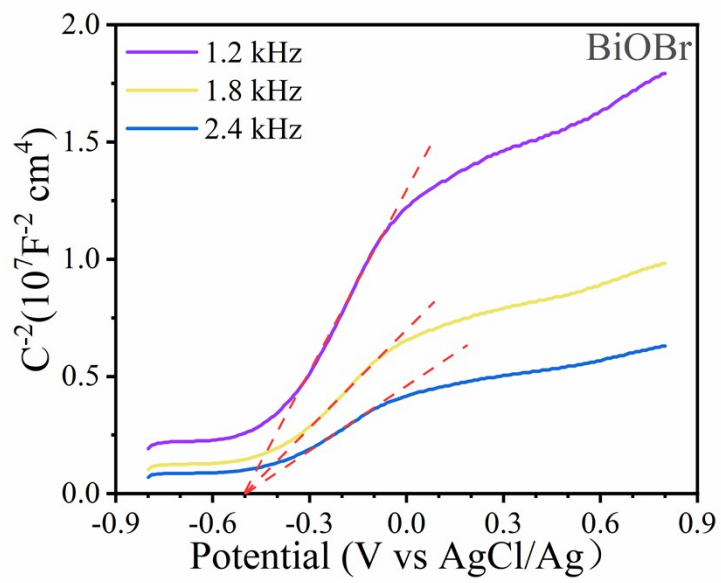

Fig. S2 Mottschotky curve of BiOBr

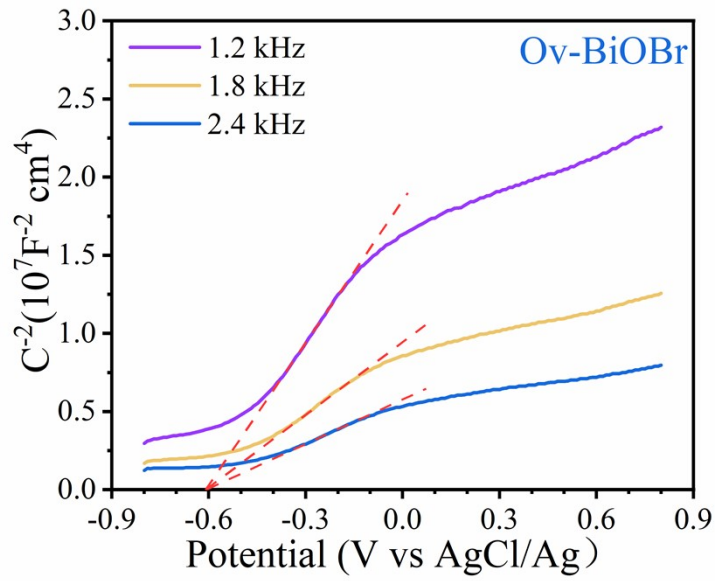

Fig. S3 Mottschottky curve of Ov-BiOBr

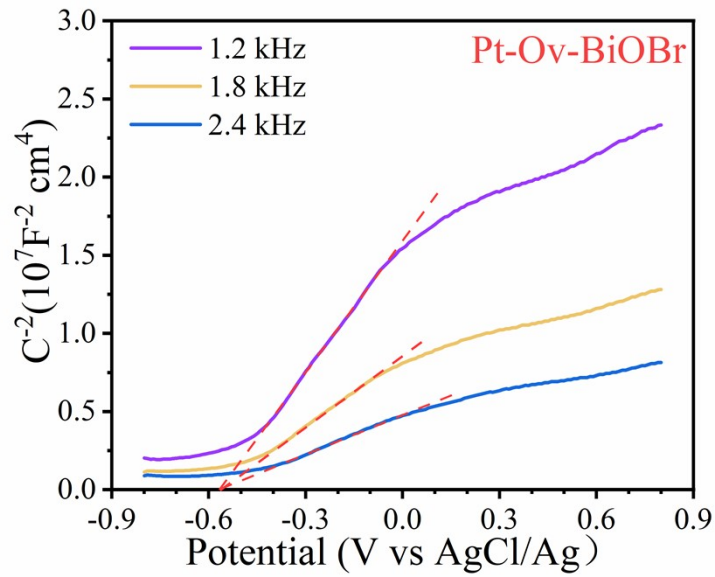

Fig. S4 Mottschottky curve of Pt-Ov-BiOBr

The band edge positions of catalysts. can be calculated using the following equation:

$$E_{CB} (V \text{ vs. } NHE) = E_{fb} (V \text{ vs. } AgCl/Ag) + 0.197 - X \text{-----Eq. s1}$$

$$E_{VB} = E_{CB} + E_g \text{----- Eq. s2}$$

Where  $E_{VB}$  and  $E_{cB}$  stand for the valence band edge potential and conduction band edge potential, respectively;  $E_{AgCl/Ag}=0.197V$  (saturated potassium chloride) vs. NHE; X is the voltage difference between the conduction band value and the flat potential value, generally 0.1-0.2 eV (the conduction bands of n-type semiconductors are normally 0.1-0.2 eV deeper than the flat-band potential). Therefore, the conduction band position is obtained by subtracting 0.3eV from the potential of each flat band.

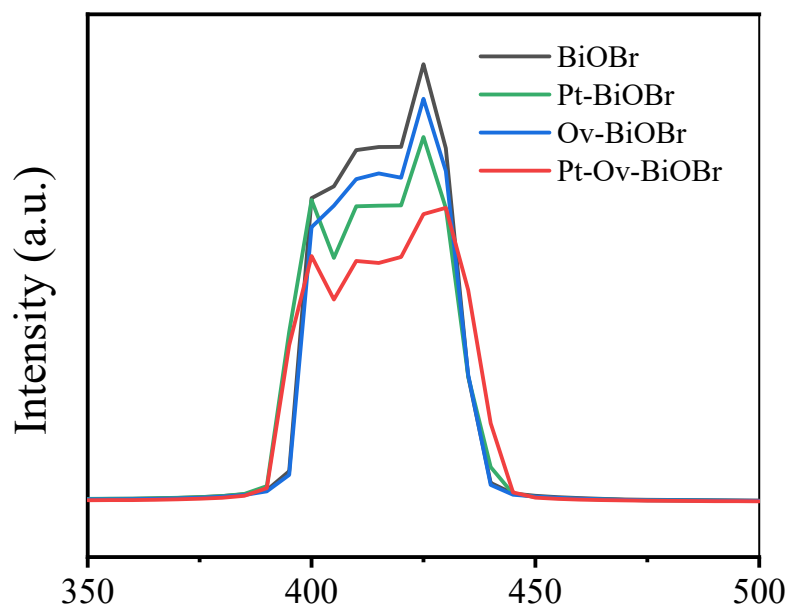

Fig. S5 PL atlas of different samples

Table S1 XPS ratio of each sample

| Sample      | Ov ratio | Bi <sup>(3-x)+</sup> ratio | Pt <sup>2+</sup> ratio |
|-------------|----------|----------------------------|------------------------|
| Pt-BiOBr    |          |                            | 12.8                   |
| Ov-BiOBr    | 24.29    | 5.16                       |                        |
| Pt-Ov-BiOBr | 32.6     | 11.82                      | 25.9                   |
